# Supplementary material
Source: Research Square preprint supplement (doi:10.21203/rs.3.rs-9408278/v1)
Supplement: Supplementary file 1 [file 73eb2904a875cdde1f402321.pdf]

**Table 1: Clinical demographic information of cases used in the study**

| Case | Sex          | Age (yr)         | BS: Tau | Thal phase | BS:LB | ARTAG | PMD (hr)        |
|------|--------------|------------------|---------|------------|-------|-------|-----------------|
| CN   | Female       | 82               | 1       | 0          | 0     | -     | 7.45            |
| CN   | Female       | 89               | 1       | 0          | 0     | -     | 13              |
|      | <b>2F</b>    | <b>85.5±1.75</b> |         |            |       |       | <b>10.2±1.3</b> |
| PSP  | Male         | 77               | 2       | 0          | 3     | +     | 5.4             |
| PSP  | Female       | 84               | 3       | 3          | 0     | +     | 8.4             |
|      | <b>1M/1F</b> | <b>80.5±1.75</b> |         |            |       |       | <b>6.9±0.75</b> |

*Note: Average of demographic values are presented as mean ± standard error of mean (SEM, bold values); BS: Tau, Braak staging for Tau positivity; BS:LB, Braak staging for Lewy body; Thal phase amyloid staging where 0= no amyloid and 5= extensive amyloid spread; ARTAG, age related tau astrogliaopathy; PMD, postmortem delay; yr, years; hr, hours.*

**Table 2: Histological analyses showing cell specific counting (density) of different astrocytic subtypes in different brain regions of CN and PSP cases (mean  $\pm$ SEM)**

| <b>Brain regions</b>       | <b>CN</b><br>(# cell/field) | <b>PSP</b><br>(# cell/field) | <b>p-value</b> |
|----------------------------|-----------------------------|------------------------------|----------------|
| <b>Frontal cortex</b>      |                             |                              |                |
| <i>Protoplasmic</i>        | 109.28 $\pm$ 5.924          | 129.95 $\pm$ 6.104           | 0.34           |
| <i>Fibrous</i>             | 19 $\pm$ 1.571              | 17.49 $\pm$ 0.572            | 0.88           |
| <i>IL-As</i>               | 212.50 $\pm$ 11.530         | 257.50 $\pm$ 9.969           | 0.20           |
| <i>Vp-As</i>               | 18.49 $\pm$ 1.515           | 29.99 $\pm$ 0.901            | 0.05           |
| <i>Tufted</i>              | 6.245 $\pm$ 0.596           | 18 $\pm$ 2.150               | 0.02           |
| <i>AT8+ve</i>              | 17 $\pm$ 1.075              | 107.49 $\pm$ 2.246           | 0.02           |
| <i>AT8+ve (subtype I)</i>  | 8.50 $\pm$ 0.649            | 29 $\pm$ 3.206               | 0.02           |
| <i>AT8+ve (subtype II)</i> | 10.99 $\pm$ 0.467           | 81 $\pm$ 3.49                | 0.02           |
| <i>AT8-ve</i>              | 66.99 $\pm$ 4.990           | 3.99 $\pm$ .061              | 0.02           |
| <b>Temporal cortex</b>     |                             |                              |                |
| <i>Protoplasmic</i>        | 68.81 $\pm$ 5.644           | 24.98 $\pm$ 1.952            | 0.02           |
| <i>Fibrous</i>             | 62.49 $\pm$ 5.248           | 29.75 $\pm$ 1.744            | 0.02           |
| <i>IL-As</i>               | 65.75 $\pm$ 1.771           | 35.24 $\pm$ 1.384            | 0.02           |
| <i>Vp-As</i>               | 26 $\pm$ 1.145              | 73.49 $\pm$ 6.068            | 0.02           |
| <i>Thorn-shaped</i>        | 17.49 $\pm$ 7.603           | 18 $\pm$ 2.215               | 0.68           |
| <i>Ramified</i>            | 3.75 $\pm$ 0.76             | 55.75 $\pm$ 4.71             | 0.02           |
| <i>Granular/fuzzy</i>      | 2.5 $\pm$ 0.28              | 26 $\pm$ 5.10                | 0.02           |
| <i>AT8+ve</i>              | 4.24 $\pm$ 0.72             | 75 $\pm$ 3.80                | 0.02           |
| <i>AT8+ve (subtype I)</i>  |                             | 65.50 $\pm$ 4.39             |                |
| <i>AT8+ve (subtype II)</i> | 0.75 $\pm$ 0.32             | 7.50 $\pm$ 0.72              | 0.02           |
| <i>AT8-ve</i>              | 43.25 $\pm$ 7.29            | 43.25 $\pm$ 7.29             | 0.05           |
| <i>As Plaque</i>           | 8.25 $\pm$ 7.029            | 63.49 $\pm$ 7.28             | 0.02           |
| <b>Cerebellum</b>          |                             |                              |                |
| <i>Fibrous</i>             | 71.18 $\pm$ 1.39            | 10.12 $\pm$ 19.270           | 0.02           |
| <i>Valate</i>              | 100.42 $\pm$ 3.13           | 183.12 $\pm$ 16.93           | 0.02           |
| <i>Bergmann</i>            | 144.43 $\pm$ 4.26           | 201.13 $\pm$ 3.98            | 0.02           |
| <i>Thorn-shaped</i>        | 9.74 $\pm$ 0.37             | 11.75 $\pm$ 1.20             | 0.85           |
| <i>Ramified</i>            | 17.24 $\pm$ 0.54            | 27.76 $\pm$ 0.94             | 0.02           |
| <i>Astrocytic plaque</i>   | 36.32 $\pm$ 1.28            | 50.50 $\pm$ 1.18             | 0.02           |
| <i>AT8+ve</i>              | 2.25 $\pm$ 0.72             | 54.64 $\pm$ 4.94             | 0.02           |
| <i>AT8+ve (subtype II)</i> |                             | 34.55 $\pm$ 4.094            |                |
| <i>AT8-ve</i>              | 80.63 $\pm$ 6.25            | 5.49 $\pm$ 1.19              | 0.02           |
| <b>Caudate nucleus</b>     |                             |                              |                |
| <i>Protoplasmic</i>        | 58.77 $\pm$ 2.46            | 45.48 $\pm$ 2.22             | 0.11           |
| <i>Fibrous</i>             | 22.50 $\pm$ 2.25            | 43.71 $\pm$ 3.13             | 0.11           |
| <i>Vp-As</i>               | 0.49 $\pm$ 0.022            | 3.99 $\pm$ 0.68              | 0.14           |
| <i>Tufted</i>              | 1.99 $\pm$ 0.31             | 33.37 $\pm$ 2.43             | 0.02           |
| <i>Thorn-shaped</i>        | 6.76 $\pm$ 0.60             | 1.38 $\pm$ 0.60              | 0.34           |
| <i>Ramified</i>            | 3.98 $\pm$ 0.56             | 9.5 $\pm$ 0.41               | 0.02           |
| <i>Granular/fuzzy</i>      | 2.25 $\pm$ 0.57             | 4.25 $\pm$ 0.57              | 0.60           |
| <i>AT8+ve</i>              | 3.25 $\pm$ 0.54             | 41.24 $\pm$ 3.02             | 0.02           |
| <i>AT8+ve (subtype I)</i>  | 0.99 $\pm$ 0.043            | 24 $\pm$ 2.54                | 0.02           |
| <i>AT8+ve (subtype II)</i> |                             | 16.49 $\pm$ 1.86             |                |

|                            |            |            |      |
|----------------------------|------------|------------|------|
| <i>AT8-ve</i>              | 29.75±2.73 | 3.5±1.24   | 0.02 |
| <b>Putamen</b>             |            |            |      |
| <i>Protoplasmic</i>        | 16.51±1.28 | 24.24±3.34 | 0.51 |
| <i>Fibrous</i>             | 18.25±2.09 | 18±2.57    | 0.88 |
| <i>Tufted</i>              | 1.25±0.32  | 8.99±0.88  | 0.02 |
| <i>Thorn-shaped</i>        | 7.75±0.72  | 14.74±1.84 | 0.34 |
| <i>Ramified</i>            | 5.99±1.27  | 5.99±0.40  | >0.9 |
| <i>Granular/fuzzy</i>      |            | 9.25±0.60  |      |
| <i>AT8+ve</i>              |            | 66.75±10.6 |      |
| <i>AT8+ve (subtype I)</i>  |            | 36.75±7.78 |      |
| <i>AT8+ve (subtype II)</i> |            | 27.24±3.38 |      |
| <i>AT8-ve</i>              | 83.25±4.77 | 1.25±0.54  | 0.02 |
| <i>As Plaque</i>           | 0.75±0.21  | 12.5±2.99  | 0.02 |
| <b>Medulla Oblongata</b>   |            |            |      |
| <i>Protoplasmic</i>        | 77.38±4.58 | 16±1.31    | 0.02 |
| <i>Fibrous</i>             | 67.63±4.58 | 51.39±5.84 | 0.48 |
| <i>Tufted</i>              | 3.75±0.65  | 17.75±1.87 | 0.02 |
| <i>Thorn-shaped</i>        | 15±1.02    | 6.49±1.53  | 0.11 |
| <i>Ramified</i>            | 2.74±0.21  | 7.23±0.48  | 0.02 |
| <i>Granular/fuzzy</i>      | 1.24±0.42  | 13.49±1.10 | 0.02 |
| <i>AT8+ve</i>              | 0.25±0.011 | 8.74±0.94  | 0.02 |
| <i>AT8+ve (subtype I)</i>  |            | 2.99±0.75  |      |
| <i>AT8+ve (subtype II)</i> |            | 3.75±0.89  |      |
| <i>AT8-ve</i>              | 52±2.05    |            |      |
| <i>As Plaque</i>           |            | 3.75±0.60  |      |

*Note: Counts of astrocytes were expressed as numbers per unit area and exact p-values are reported. IL-As, interlaminar astrocytes; Vp-As, varicose projection astrocytes; AT8+Ve, tau positive astrocytes; AT8+ve (subtype I), Tau infiltrated astrocytic subtype I; AT8+ve (subtype II), Tau infiltrated astrocytic subtype II; AT8-ve, tau negative astrocytes.*

**Supplementary Table 3:** Detailed information regarding antibodies, chemicals and software used in the study

| Reagent/ resources                | Source                       | Identifier/ details                                                                                                                                 |
|-----------------------------------|------------------------------|-----------------------------------------------------------------------------------------------------------------------------------------------------|
| <b>Antibodies</b>                 |                              |                                                                                                                                                     |
| rabbit anti-GFAP                  | Abcam                        | Cat # ab194324, RRID: AB_3662092                                                                                                                    |
| mouse anti-ICAM-1                 | Proteintech                  | Cat# CL594-60299, RRID:AB_2883457                                                                                                                   |
| mouse anti-S100B                  | EMD Milipore                 | Cat# MAB079-1, RRID:AB_571112                                                                                                                       |
| rabbit anti-GSK3B                 | Cell Signaling Technology    | Cat # 9315S, RRID: AB_490890                                                                                                                        |
| mouse anti-AT8                    | Invitrogen                   | Cat# MN1020, RRID:AB_223647                                                                                                                         |
| rabbit anti-IBA-1                 | Invitrogen                   | Cat# PA5-27436, RRID:AB_2544912                                                                                                                     |
| NeuroTrace                        | ThermoFisher                 | Cat # N21479, RRID: AB_2341101                                                                                                                      |
| rabbit anti-Claudin 5             | Abcam                        | Cat# ab131259, RRID:AB_11157940                                                                                                                     |
| DAPI                              | Milipore                     |                                                                                                                                                     |
| Goat anti-rabbit TRITC            | Santa Cruz Biotechnology     | Cat# sc-2780, RRID: AB_649006                                                                                                                       |
| Goat anti-mouse AlexaFluor 555    | Thermo Fisher Scientific     | Cat# A-21422, RRID: AB_2535844                                                                                                                      |
| Goat anti-mouse AlexaFluor 647    | Abcam                        | Cat# ab150115, RRID: AB_2687948                                                                                                                     |
| Goat anti-mouse AlexaFluor 488    | Thermo Fisher Scientific     | Cat# A-11001, RRID: AB_2534069                                                                                                                      |
| Donkey anti-rabbit AlexaFluor 488 | Thermo Fisher Scientific     | Cat# A-21206, RRID: AB_2535792                                                                                                                      |
| <b>Chemicals</b>                  |                              |                                                                                                                                                     |
| Mercury(II) chloride              | Milipore                     | Cat # M1136, CAS: 7487-94-7                                                                                                                         |
| Potassium chromate                | Milipore                     | Cat # 12249, CAS: 7789-00-6                                                                                                                         |
| Potassium di-chromate             | Milipore                     | Cat # 207802, CAS: 7778-50-9                                                                                                                        |
| Ethyl alcohol                     | Milipore                     | Cat # 493511, CAS: 64-17-5                                                                                                                          |
| Sodium Thiosulfate                | Milipore                     | Cat # 72049, CAS: 7772-98-7                                                                                                                         |
| Sodium chloride                   | Milipore                     | Cat # S9888, CAS: 7647-14-5                                                                                                                         |
| di-sodium hydrogen phosphate      | Milipore                     | Cat # 1.06585, CAS: 7558-79-4                                                                                                                       |
| Triton X-100                      | Milipore                     | Cat # X100, CAS: 9036-19-5                                                                                                                          |
| Tween 20                          | Milipore                     | Cat # P1379, CAS: 9005-64-5                                                                                                                         |
| <b>Software and algorithms</b>    |                              |                                                                                                                                                     |
| Fiji 1.54p                        | <i>Schneider et al., (1)</i> | <a href="https://imagej.net/">https://imagej.net/</a>                                                                                               |
| Image J 1.53m                     | <i>Schneider et al., (1)</i> | <a href="https://imagej.net/">https://imagej.net/</a>                                                                                               |
| Imaris 10                         | Oxford Instrument            | <a href="https://imaris.oxinst.com/">https://imaris.oxinst.com/</a>                                                                                 |
| Inkscape 1.4.2                    | Inkscape project             | <a href="https://inkscape.org/release/inkscape-1.4.2/windows/64-bit/msi/dl/">https://inkscape.org/release/inkscape-1.4.2/windows/64-bit/msi/dl/</a> |
| Wind rose plot                    | Jupiter notebook             | <a href="https://pypi.org/project/windrose/1.6/">https://pypi.org/project/windrose/1.6/</a>                                                         |
| Simple Neurite Tracer             | <i>Longhair et al.,(2)</i>   | <a href="https://imagej.net/plugins/snt/">https://imagej.net/plugins/snt/</a>                                                                       |
| Neuron Studio                     | <i>Wearne et al., (3)</i>    | <a href="https://biii.eu/neuronstudio">https://biii.eu/neuronstudio</a>                                                                             |

|                |                             |                                                                                                       |
|----------------|-----------------------------|-------------------------------------------------------------------------------------------------------|
| NeuroMorphoVis | <i>Abdellah et al., (4)</i> | <a href="https://github.com/BlueBrain/NeuroMorphoVis">https://github.com/BlueBrain/NeuroMorphoVis</a> |
| Blender 3.1.0  | Blender<br>development team | <a href="https://www.blender.org/">https://www.blender.org/</a>                                       |
| Prism 10.1.1   | GraphPad                    | <a href="https://www.graphpad.com/features">https://www.graphpad.com/features</a>                     |

*Note: Secondary antibodies were selected based on experimental design and spectral compatibility.*

*References:*

1. J. Schindelin *et al.*, Fiji: an open-source platform for biological-image analysis. *Nat Methods* **9**, 676-682 (2012).
2. M. H. Longair, D. A. Baker, J. D. Armstrong, Simple Neurite Tracer: open source software for reconstruction, visualization and analysis of neuronal processes. *Bioinformatics* **27**, 2453-2454 (2011).
3. S. L. Wearne *et al.*, New techniques for imaging, digitization and analysis of three-dimensional neural morphology on multiple scales. *Neuroscience* **136**, 661-680 (2005).
4. M. Abdellah *et al.*, NeuroMorphoVis: a collaborative framework for analysis and visualization of neuronal morphology skeletons reconstructed from microscopy stacks. *Bioinformatics* **34**, i574-i582 (2018).
