# Supplementary material
Source: Research Square preprint supplement (doi:10.21203/rs.3.rs-9408278/v1)
Supplement: Supplementary file 2 [file 846e9d499718fe0c37847ba6.pdf]

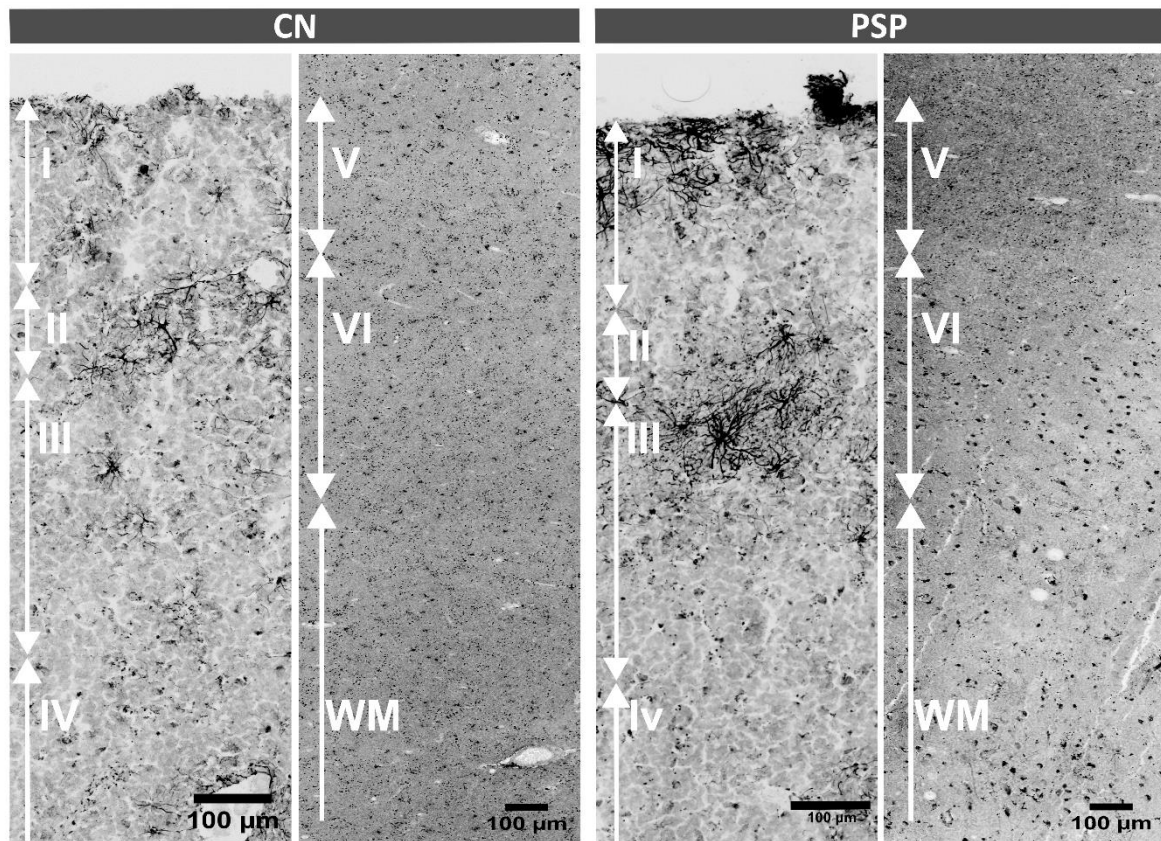

**Supplementary figure 1. Astrocytic reactivity and heterogeneity across PSP temporal cortical layers.** Representative astrocytic GFAP image in grey-scale and inverted for better visualization showing layer-wise astrocytic reactivity and heterogeneity across temporal cortex in CN and PSP brains (*scale bar= 100μm*). *WM= white matter*
